# Supplementary material for: The Fluorescent D-Amino Acid NADA as a Tool to Study the Conditional Activity of Transpeptidases in Escherichia coli
Source: PubMed Central journal article supplement (PMC6131605; doi:10.3389/fmicb.2018.02101), 2018-09-04
Supplement: Data_Sheet_1.pdf [file Data_Sheet_1.pdf]

## Supplementary Information

# **The fluorescent D-amino acid NADA as a tool to study the conditional activity of transpeptidases in *Escherichia coli***

Alejandro Montón Silva<sup>1</sup>, Christian Otten<sup>2</sup>, Jacob Biboy<sup>2</sup>, Eefjan Breukink<sup>3</sup>, Michael VanNieuwenhze<sup>4</sup>, Waldemar Vollmer<sup>2</sup>, and Tanneke den Blaauwen<sup>1\*</sup>.

<sup>1</sup> Bacterial Cell Biology & Physiology, Swammerdam Institute for Life Sciences, University of Amsterdam, Science park 904, 1098 XH Amsterdam, The Netherlands.

<sup>2</sup> The Centre for Bacterial Cell Biology, Institute for Cell and Molecular Biosciences, Newcastle University, Newcastle upon Tyne, United Kingdom.

<sup>3</sup> Department of Membrane Biochemistry and Biophysics, Institute of Biomembranes, Utrecht University, Padualaan 8, 3584 CH Utrecht, The Netherlands.

<sup>4</sup> Department of Chemistry, Indiana University Bloomington, Bloomington, IN 47405, USA.

\* CORRESPONDENCE:

Dr. Tanneke den Blaauwen

t.denblaauwen@uva.nl

## **Supplemental Information**

**Table S1:** *E. coli* strains

**Table S2:** Oligonucleotides

**Table S3:** Plasmids

**Table S4:** Transformations for PG labelling with NADA

**Figure S1:** *in vitro* assay of HADA incorporation by LdtD at pH 7.0

**Figure S2:** NADA incorporation in cells expressing or not LdtD.

**Figure S3:** Wild type BW25113 expressing LdtD in the presence of cefsulodin.

**Figure S4:** BW25113 $\Delta$ *mrcB* strain expressing PBP1b variants alone or with LdtD in the presence of aztreonam.

## **References**

**Table S1:** *E. coli* strains

| <b>Strain</b>                              | <b>Description</b>                                                                                                                                        | <b>Reference</b>      |
|--------------------------------------------|-----------------------------------------------------------------------------------------------------------------------------------------------------------|-----------------------|
| BW25113                                    | <i>F</i> -, <i>DE(araD-araB)567, lacZ4787(del)::rrnB-3, LAM</i> -, <i>rph-1, DE(rhaD-rhaB)568, hsdR514</i>                                                | Datsenko et al., 2000 |
| BW25113 $\Delta$ <i>lpoA</i>               | BW25113 $\Delta$ <i>lpoA::kan</i>                                                                                                                         | Gray et al., 2015     |
| BW25113 $\Delta$ <i>mrcA</i>               | BW25113 $\Delta$ <i>mrcA::kan</i>                                                                                                                         | Gray et al., 2015     |
| BW25113 $\Delta$ <i>lpoB</i>               | BW25113 $\Delta$ <i>lpoB::kan</i>                                                                                                                         | Gray et al., 2015     |
| BW25113 $\Delta$ <i>mrcB</i>               | BW25113 $\Delta$ <i>mrcB::kan</i>                                                                                                                         | Gray et al., 2015     |
| BW25113 $\Delta$ <i>cpoB</i>               | BW25113 $\Delta$ <i>cpoB::kan</i>                                                                                                                         | Gray et al., 2015     |
| BW25113 $\Delta$ <i>pbpC</i>               | BW25113 $\Delta$ <i>pbpC::kan</i>                                                                                                                         | Baba et al., 2006     |
| CS109                                      | W1485 <i>rpoS rph</i>                                                                                                                                     | Denome et al., 1999   |
| CS109 $\Delta$ <i>dacA</i>                 | CS109 $\Delta$ <i>dacA::kan</i>                                                                                                                           | Denome et al., 1999   |
| CS109 $\Delta$ <i>dacC</i>                 | CS109 $\Delta$ <i>dacC::kan</i>                                                                                                                           | Potluri et al., 2012  |
| CS109 $\Delta$ <i>dacD</i>                 | CS109 $\Delta$ <i>dacD::kan</i>                                                                                                                           | Potluri et al., 2012  |
| BW25113 $\Delta$ 6LDT                      | BW25113 $\Delta$ <i>ldtA, \Delta</i> <i>ldtB, \Delta</i> <i>ldtC, \Delta</i> <i>ldtD, \Delta</i> <i>ldtE, \Delta</i> <i>ldtF::kan</i>                     | Kuru et al., 2017     |
| BW25113 $\Delta$ 6LDT $\Delta$ <i>dacA</i> | BW25113 $\Delta$ <i>ldtA, \Delta</i> <i>ldtB, \Delta</i> <i>ldtC, \Delta</i> <i>ldtD, \Delta</i> <i>ldtE, \Delta</i> <i>ldtF, \Delta</i> <i>dacA::kan</i> | This work             |
| LOBSTR-BL21(DE3)                           | <i>F</i> - <i>ompT hsdSB(rB- mB-)</i> <i>gal dcm</i> (DE3), carries genomically modified copies of <i>arnA</i> and <i>slyD</i>                            | Kerafast              |

**Table S2.** Oligonucleotides

| <b>Primer</b> | <b>Sequence 5' &gt; 3'</b>                        | <b>Description</b>                    | <b>Used to make</b> |
|---------------|---------------------------------------------------|---------------------------------------|---------------------|
| AMS-GA7-F     | TCTAGAGTCGACCTGCAGGC ATGCCCATGGTCTGTTTC           | pACYC linearization fwd               | pAMS03-05           |
| AMS-GA7-R     | CTGTGTGAAATTATTTTACCA CAGGAAACAGACCATG            | pACYC linearization rev               | pAMS03-05           |
| AMS-GA7k-F    | GATGCGTCGTGTAAATATTC TTTGCGCATGCCTGCAGG           | <i>ldtA</i> fragment fwd              | pAMS03(ErfK)        |
| AMS-GA7k-R    | TCGACTCTAGATTA AAAACAT CTGTCTTGAACATTTACACAGGAA   | <i>ldtA</i> fragment rev              | pAMS03(ErfK)        |
| AMS-GA7y-F    | ACAGACCATGGATGAATATG AAATTGAAAACGCATGCCTGCAG      | <i>ldtB</i> fragment fwd              | pAMS04(YbiS)        |
| AMS-GA7y-R    | GTCGACTCTAGATTAATT CAGACGAACCGGCATCCCATTTACACAGGA | <i>ldtB</i> fragment rev              | pAMS04(YbiS)        |
| AMS-GA7c_F    | AACAGACCATGGATGATCAAACGCGTTTTTTCGCATGCCTGCAG      | <i>ldtC</i> fragment fwd              | pAMS05(YcfS)        |
| AMS-GA7c_R    | GTCGACTCTAGATTACAGCGTTTGTGGGCTCAC                 | <i>ldtC</i> fragment rev              | pAMS05(YcfS)        |
| nm182         | GGAGGCCATGGGTCCTCGCTTGTTAACCAAACGCGG              | PBP1c fragment with <i>NcoI</i> site  | pNM039              |
| nm183         | GGAGGGAATTCTTGCATGACAAATTTCACTGTCGCGATTTGCC       | PBP1c fragment with <i>EcoRI</i> site | pNM039              |

**Table S3.** Plasmids

| Plasmids      | Relevant characteristics                                                                                                                                                           | Source or Reference              |
|---------------|------------------------------------------------------------------------------------------------------------------------------------------------------------------------------------|----------------------------------|
| pJEH012(LdtD) | pACYC184 derivative; expresses <i>ldtD</i> under the IPTG-inducible <i>trc</i> promoter; Tet <sup>R</sup>                                                                          | (Hugonnet et al., 2016)          |
| pAMS01(LdtE)  | pACYC184 derivative; expresses <i>ldtE</i> under the IPTG-inducible <i>trc</i> promoter; Tet <sup>R</sup>                                                                          | (Morè et al., 2018) <sup>a</sup> |
| pAMS02(LdtF)  | pACYC184 derivative; expresses <i>ldtF</i> under the IPTG-inducible <i>trc</i> promoter; Tet <sup>R</sup>                                                                          | (Morè et al., 2018) <sup>a</sup> |
| pAMS03(LdtA)  | pACYC184 derivative; expresses <i>ldtA</i> under the IPTG-inducible <i>trc</i> promoter; Tet <sup>R</sup>                                                                          | This work                        |
| pAMS04(LdtB)  | pACYC184 derivative; expresses <i>ldtB</i> under the IPTG-inducible <i>trc</i> promoter; Tet <sup>R</sup>                                                                          | This work                        |
| pAMS05(LdtC)  | pACYC184 derivative; expresses <i>ldtC</i> under the IPTG-inducible <i>trc</i> promoter; Tet <sup>R</sup>                                                                          | This work                        |
| pSAV057       | <i>ptrc99A</i> derivative; contains weakened -35 promoter region (TTGACA-TTTACA); p15 origin; cat <sup>R</sup>                                                                     | (Alexeeva et al., 2010)          |
| pGS121        | pGZ119H derivative; expresses <i>ldtE</i> under the <i>tac</i> promoter; cat <sup>R</sup>                                                                                          | (Morè et al., 2018) <sup>a</sup> |
| pGS124        | pGZ119H derivative, expresses <i>ldtF</i> under the <i>tac</i> promoter; cat <sup>R</sup>                                                                                          | (Morè et al., 2018) <sup>a</sup> |
| pWA001        | <i>ptrc99A</i> derivative; expresses the mCherry-PBP1a under the IPTG-inducible weakened -35 promoter region (TTGACA-TTTACA); pBR322 origin; Amp <sup>R</sup> .                    | Banzhaf et al., 2012             |
| pUM1Bα        | <i>ptac</i> derivative; expresses the PBP1β (M <sup>1</sup> -N <sup>844</sup> ) gene under the IPTG-inducible promoter; Kan <sup>R</sup> .                                         | Meisel et al., 2003              |
| pUM1Bα*       | <i>ptac</i> derivative; expresses the PBP1β (M <sup>1</sup> -(S <sup>510</sup> A)-N <sup>844</sup> ) gene under the IPTG-inducible promoter; Kan <sup>R</sup> .                    | Meisel et al., 2003              |
| pUM1BTG*α     | <i>ptac</i> derivative; expresses the PBP1β (M <sup>1</sup> -(E <sup>233</sup> A)-N <sup>844</sup> ) gene under the IPTG-inducible promoter; Kan <sup>R</sup> .                    | Meisel et al., 2003              |
| pUM1BTG*α*    | <i>ptac</i> derivative; expresses the PBP1β (M <sup>1</sup> -(E <sup>233</sup> A:S <sup>510</sup> A)-N <sup>844</sup> ) gene under the IPTG-inducible promoter; Kan <sup>R</sup> . | Meisel et al., 2003              |
| pNM004        | <i>ptrc99A</i> derivative; expresses the OmpA gene under the IPTG-inducible weakened -35 promoter region (TTGACA-TTTACA); pBR322 origin; Amp <sup>R</sup> .                        | Meiresonne et al., 2017          |
| pNM039        | <i>ptrc99A</i> derivative; expresses mCherry-PBP1c under the IPTG-inducible weakened -35 promoter region (TTGACA-TTTACA); pBR322 origin; Amp <sup>R</sup> .                        | This work                        |
| pNM009        | <i>ptrc99A</i> derivative; expresses the PBP5 gene under the IPTG-inducible weakened -35 promoter region (TTGACA-TTTACA); p15 origin; cat <sup>R</sup> .                           | Meiresonne et al., 2017          |

|                                  |                                                                                                                                                           |                         |
|----------------------------------|-----------------------------------------------------------------------------------------------------------------------------------------------------------|-------------------------|
| pAM6a                            | <i>ptrc99A</i> derivative; expresses the PBP6a gene under the IPTG-inducible weakened -35 promoter region (TTGACA-TTTACA); p15 origin; cat <sup>R</sup> . | Meiresonne et al., 2017 |
| pAM6b                            | <i>ptrc99A</i> derivative; expresses the PBP6b gene under the IPTG-inducible weakened -35 promoter region (TTGACA-TTTACA); p15 origin; cat <sup>R</sup> . | Meiresonne et al., 2017 |
| pETMM82<br><i>dsbC-His6-ldtD</i> | pETMM82 derivative; expresses <i>ldtD</i> fused at N-terminal with DsbC and a 6×His tag                                                                   | Hugonnet et al., 2016   |

<sup>a</sup> Morè, N., Martorana, A. M., Biboy, J., Otten, C., Winkle, M., Montón Silva, A., Atkinson, L., Yau, H., Breukink, E., den Blaauwen, T., Vollmer, W., and Polissi, A. (2018). Peptidoglycan remodeling enables *E. coli* to survive severe outer membrane assembly defect. *Nature Microbiol.* Under review.

**Table S4.** Transformants for PG labelling with NADA

| <b>Strain</b>                              | <b>Plasmid(s)</b>                  | <b>Protein(s) produced</b> |
|--------------------------------------------|------------------------------------|----------------------------|
| BW25113                                    | pJEH12(LdtD)                       | LdtD                       |
| BW25113 $\Delta$ <i>lpoA</i>               | pJEH12(LdtD)                       | LdtD                       |
| BW25113 $\Delta$ <i>mrcA</i>               | pJEH12(LdtD)                       | LdtD                       |
| BW25113 $\Delta$ <i>lpoB</i>               | pJEH12(LdtD)                       | LdtD                       |
| BW25113 $\Delta$ <i>CpoB</i>               | pJEH12(LdtD)                       | LdtD                       |
| BW25113 $\Delta$ <i>mrcB</i>               | pJEH12(LdtD)                       | LdtD                       |
|                                            | pWA001                             | PBP1a                      |
|                                            | pUM1B $\alpha$                     | PBP1b                      |
|                                            | pUM1B $\alpha$ *                   | PBP1b TP*                  |
|                                            | pUM1BTG* $\alpha$                  | PBP1b GT*                  |
|                                            | pUM1BTG* $\alpha$ *                | PBP1b GT*TP*               |
|                                            | pNM039                             | PBP1c                      |
|                                            | pJEH12(LdtD)+ pWA001               | LdtD + PBP1a               |
|                                            | pJEH12(LdtD) + pUM1B $\alpha$      | LdtD + PBP1b               |
|                                            | pJEH12(LdtD) + pUM1B $\alpha$ *    | LdtD + PBP1b TP*           |
|                                            | pJEH12(LdtD) + pUM1BTG* $\alpha$   | LdtD + PBP1b GT*           |
|                                            | pJEH12(LdtD) + pUM1BTG* $\alpha$ * | LdtD + PBP1b GT*TP*        |
|                                            | pJEH12(LdtD) + pNM039              | LdtD + PBP1c               |
| BW25113 $\Delta$ <i>pbpC</i>               | pJEH12(LdtD)                       | LdtD                       |
| BW25113 $\Delta$ <i>dacA</i>               | pJEH12(LdtD)                       | LdtD                       |
| BW25113 $\Delta$ <i>dacC</i>               | pJEH12(LdtD)                       | LdtD                       |
| BW25113 $\Delta$ <i>dacD</i>               | pJEH12(LdtD)                       | LdtD                       |
| BW25113 $\Delta$ 6LDT                      | pJEH12(LdtD)                       | LdtD                       |
|                                            | pAMS01(LdtE)                       | LdtE                       |
|                                            | pAMS02(LdtF)                       | LdtF                       |
|                                            | pAMS03(LdtA)                       | LdtA                       |
|                                            | pAMS04(LdtB)                       | LdtB                       |
|                                            | pAMS05(LdtC)                       | LdtC                       |
|                                            | pAMS02(LdtF) + pGS121              | LdtF + LdtE                |
|                                            | pJEH12(LdtD) + pGS124              | LdtD + LdtF                |
| BW25113 $\Delta$ 6LDT $\Delta$ <i>dacA</i> | pJEH12(LdtD)                       | LdtD                       |
|                                            | pNM009                             | PBP5                       |
|                                            | pAM6a                              | PBP6a                      |
|                                            | pAM6b                              | PBP6b                      |
|                                            | pJEH12(LdtD) + pNM009              | LdtD + PBP5                |
|                                            | pJEH12(LdtD) + pAM6a               | LdtD + PBP6A               |
|                                            | pJEH12(LdtD) + pAM6b               | LdtD + PBP6B               |

**Figure S1.** LdtD incorporates HADA into mucopeptides and during ongoing PG de novo synthesis.

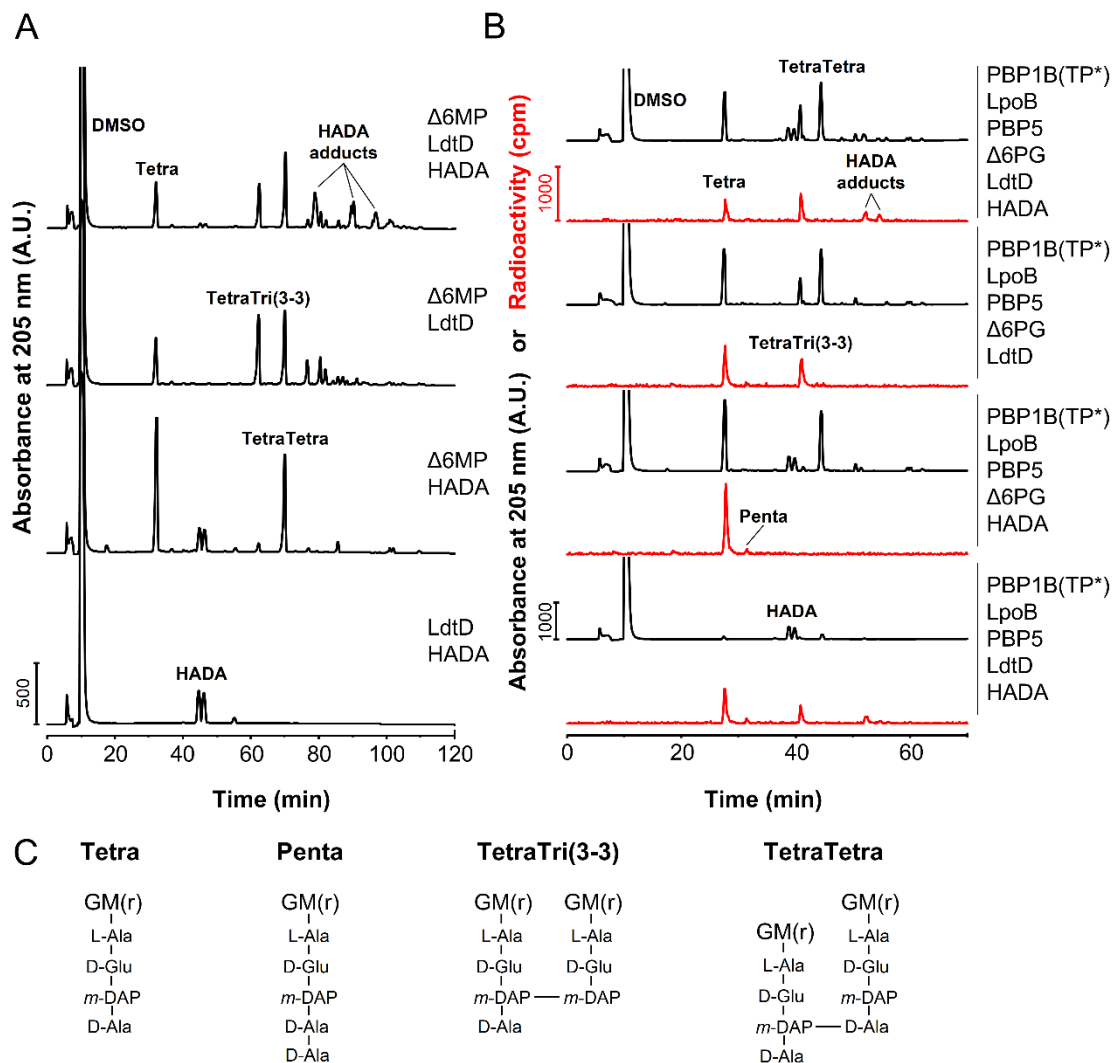

**(A)** HPLC chromatograms showing the formation of HADA adducts by LdtD incubated with mucopeptides from BW25113Δ6LDT in the presence of HADA. Samples were reduced with sodium borohydride before HPLC analysis. **(B)** HPLC chromatograms obtained from samples upon incubating radioactive labeled lipid II, PG from BW25113Δ6LDT and the proteins indicated to the right in the presence of HADA. Samples were digested with cellosyl, reduced with sodium borohydride and subjected to HPLC analysis with detection of both UV signal (black traces) and radioactivity (red traces). PBP1b (TP\*), PBP1b with an inactive transpeptidase site due to the replacement of Ser-510 by Ala. **(C)** Proposed structures of



muropeptides present in the fractions in panels A and B. G, N-acetylglucosamine; M, N-acetylmuramic acid; M(r), N-acetylmuramitol; M-P, N-acetylmuramic acid-1-phosphate; L-Ala, L-alanine; D-Glu, D-glutamic acid; D-Ala, D-alanine; m-DAP, meso-diaminopimelic acid.

**Figure S2.** Expressing *ldtD* improves incorporation of NADA

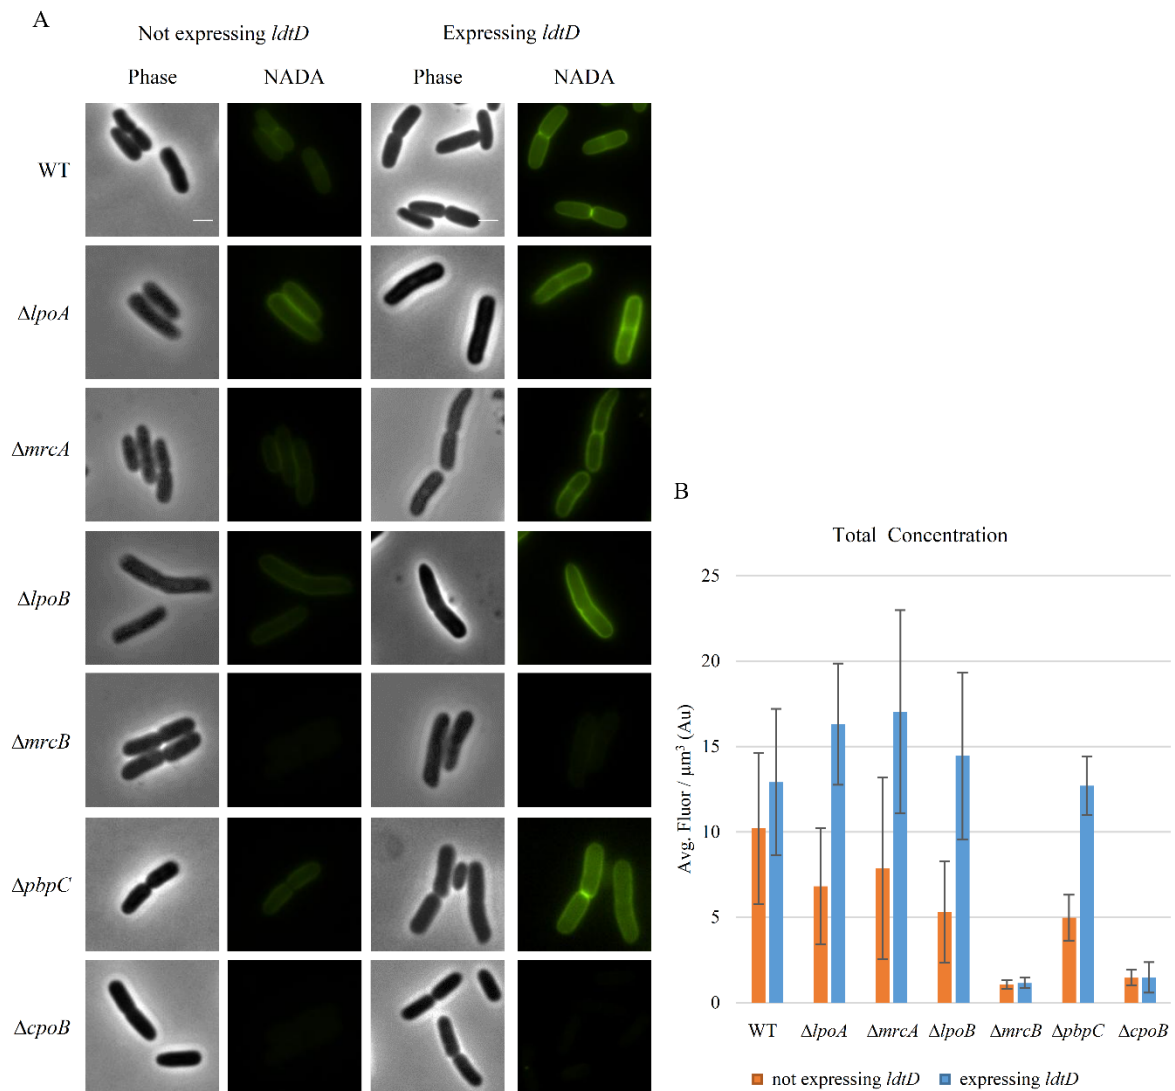

**(A)** Phase contrast and fluorescence images of empty cells (left panel) and *ldtD* expressing cells (right panel) in the strains (from top to bottom) WT BW25113,  $\Delta lpoA$  (LpoA),  $\Delta mrcA$  (PBP1a),  $\Delta lpoB$  (LpoB),  $\Delta mrcB$  (PBP1b),  $\Delta pbpC$  (PBP1c) and  $\Delta cpoB$  (CpoB). Cells were labelled with 0.5 mM NADA with a 2 min pulse. Scale bar represents 2  $\mu\text{m}$ . **(B)** Total NADA concentration (signal per  $\mu\text{m}^3$  average cell volume). Quantification of the incorporated NADA in the WT strain (in empty cells  $n=305$ ; in *ldtD* expressing cells  $n=306$ ),  $\Delta lpoA$  (in empty cells  $n=905$ ; in *ldtD* expressing cells  $n=469$ ),  $\Delta mrcA$  (in empty cells  $n=387$ ; in *ldtD* expressing cells

$n=402$ ),  $\Delta lpoB$  (in empty cells  $n=718$ ; in *LdtD* expressing cells  $n=495$ ),  $\Delta mrcB$  (in empty cells  $n=286$ ; in *ldtD* expressing cells  $n=453$ )  $\Delta pbpC$  (in empty cells  $n=298$ ; in *ldtD* expressing cells  $n=202$ ) and  $\Delta cpoB$  (in empty cells  $n=3804$ ; in *LdtD* expressing cells  $n=1335$ ).  $n$  is the number of cells analysed. Orange bars represent cells without plasmid for the expression of *ldtD* and blue bars represent cells expressing *ldtD*.

**Figure S3.** Cefsulodin-treated cells miss incorporation of NADA at mid-cell.

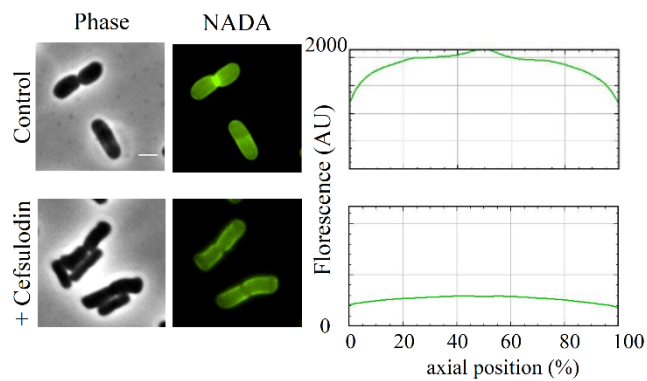

Phase contrast and corresponding fluorescence images of wild type BW25113 cells expressing *ldtD* without cefsulodin (control) or after 1 h incubation with 1  $\mu\text{g}/\text{mL}$  cefsulodin in the presence of 0.5 mM NADA. Scale bar, 2  $\mu\text{m}$ . Right panels show the average fluorescence profiles of the cells (from 0 to 2000 AU) plotted against normalized cell length (from 0 to 100%).

**Figure S4.** Overproduction of LdtD prevents cell lysis in BW25113 $\Delta mrcB$  cells when the TPase activity of PBP1b is absent and a functional PBP1b GTase domain is present.

$\Delta mrcB$  + 1 h aztreonam (1  $\mu\text{g}/\text{mL}$ )

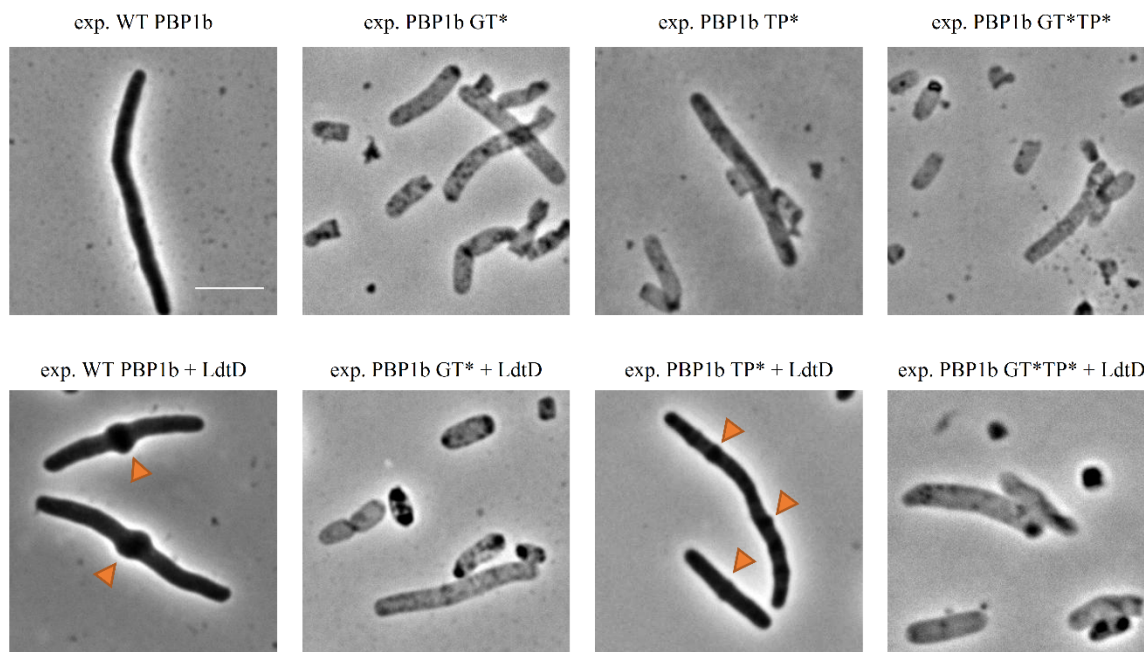

Phase contrast images of  $\Delta mrcB$  cells producing, from left to right, PBP1b, PBP1b GT\* (inactive GTase domain), PBP1b TP\* (inactive TPase domain) and PBP1b GT\*TP\* (inactive GTase and TPase domains) alone (upper panel) or in combination with LdtD (lower panel) after 1 h treatment with 1  $\mu\text{g}/\text{mL}$  aztreonam. Scale bar, 5  $\mu\text{m}$ . Orange triangles point to the bulges at constriction sites.

## References

- 1- Alexeeva, S., Gadella, T. W. J., Verheul, J., Verhoeven, G. S., & Blaauwen, den, T. (2010). Direct interactions of early and late assembling division proteins in *Escherichia coli* cells resolved by FRET. *Mol. Microbiol.* 77(2), 384–398. <http://doi.org/10.1111/j.1365-2958.2010.07211.x>
- 2- Baba, T., Ara, T., Hasegawa, M., Takai, Y., Okumura, Y., Baba, M., Datsenko, K. A., Tomita, M., Wanner, B. L., Mori, H. (2006). Construction of *Escherichia coli* K-12 in-frame, single-gene knockout mutants: the Keio collection. *Mol. Syst. Biol.* 2, 2006.0008. Epub 2006 Feb 21.
- 3- Datsenko, K. A., Wanner B.L. (2000). One-step inactivation of chromosomal genes in *Escherichia coli* K-12 using PCR products. *Proc. Natl. Acad. Sci.* 97, 6640–6645.
- 4- Denome, S. A., Elf, P. K., Henderson, T. A., Nelson, D. E., Young, K. D. (1999). *Escherichia coli* mutants lacking all possible combinations of eight penicillin binding proteins: Viability, characteristics, and implications for peptidoglycan synthesis. *J. Bacteriol.* 181, 3981–3993.
- 5- Gray, A. N., Egan, A. J. F., van't Veer, I. L., Verheul, J., Colavin, A., Koumoutsi, A., Biboy, J., Altelaar, A. F. M., Damen, M. J., Huang, K. C., Simorre, J. P., Breukink, E., den Blaauwen, T., Typas, A., Gross, C. A., and Vollmer, W. (2015). Coordination of peptidoglycan synthesis and outer membrane constriction during *Escherichia coli* cell division. *eLife* 4, e07118.
- 6- Hugonnet, J. E., Mengin-Lecreulx, D., Monton, A., den Blaauwen, T., Carbonnelle, E., Veckerlé, C., Brun, Y. V., van Nieuwenhze, M., Bouchier, C., Tu, K., Rice, L. B., and Arthur, M. (2016). Factors essential for L,D-transpeptidase mediated peptidoglycan cross-linking and  $\beta$ -lactam resistance in *Escherichia coli*. *eLife* 5. e19469. doi: 10.7554/eLife.19469.

- 7- Kuru, E., Hughes, V. H., Brown, P. J., Hall, E., Tekkam, S., Cava, F., de Pedro, M. A., Brun, Y. V., and van Nieuwenhze, M. S. (2012). In Situ Probing of Newly Synthesized Peptidoglycan in Live Bacteria with Fluorescent d-Amino Acids. *Angew. Chem. Int. Ed.* 51, 12519–12523.
- 8- Kuru, K., Lambert, C., Rittichier, J., Till, R., Ducret, A., Derouaux, A., Gray, J., Biboy, J., Vollmer, W., VanNieuwenhze, M., Brun, Y. V., Sockett, R. E. (2017). Fluorescent D-amino-acids reveal bi-cellular cell wall modifications important for *Bdellovibrio bacteriovorus* predation. *Nat. Microbiol.* 2(12), 1648-1657. doi: 10.1038/s41564-017-0029-y.
- 9- Meiresonne, N. Y., van der Ploeg, R., Hink, M. A., and den Blaauwen T. (2017). Activity-Related Conformational Changes in d,d-Carboxypeptidases Revealed by In Vivo Periplasmic Förster Resonance Energy Transfer Assay in *Escherichia coli*. *mBio* 8(5), e01089-17. doi: 10.1128/mBio.01089-17.
- 10- Meisel, U., Hoeltje, J. V., Vollmer, W. (2003). Overproduction of inactive variants of the murein synthase PBP1B causes lysis in *Escherichia coli*. *J Bacteriol.* 185(18), 5342–5348.
- 11- Morè, N., Martorana, A. M., Biboy, J., Otten, C., Winkle, M., Montón Silva, A., Atkinson, L., Yau, H., Breukink, E., den Blaauwen, T., Vollmer, W., and Polissi, A. (2018). Peptidoglycan remodeling enables *E. coli* to survive severe outer membrane assembly defect. Manuscript submitted.
- 12- Potluri, L. P., de Pedro, M. A., Young, K. D. (2012). *Escherichia coli* low-molecular-weight penicillin-binding proteins help orient septal FtsZ, and their absence leads to asymmetric cell division and branching. *Mol. Microbiol.* 84(2), 203-24.
